# Supplementary material
Source: publisher site journal article supplement (https://www.dovepress.com/article/489783)
Supplement: Supplementary file 1 [file get_supplementary_file.php]

Supplementary data

**Estimating costs associated with adverse events in patients with advanced lung cancer**

**Supplementary Figure 1.** Comparing the costs with and without adverse event (AE) for incremental cost.


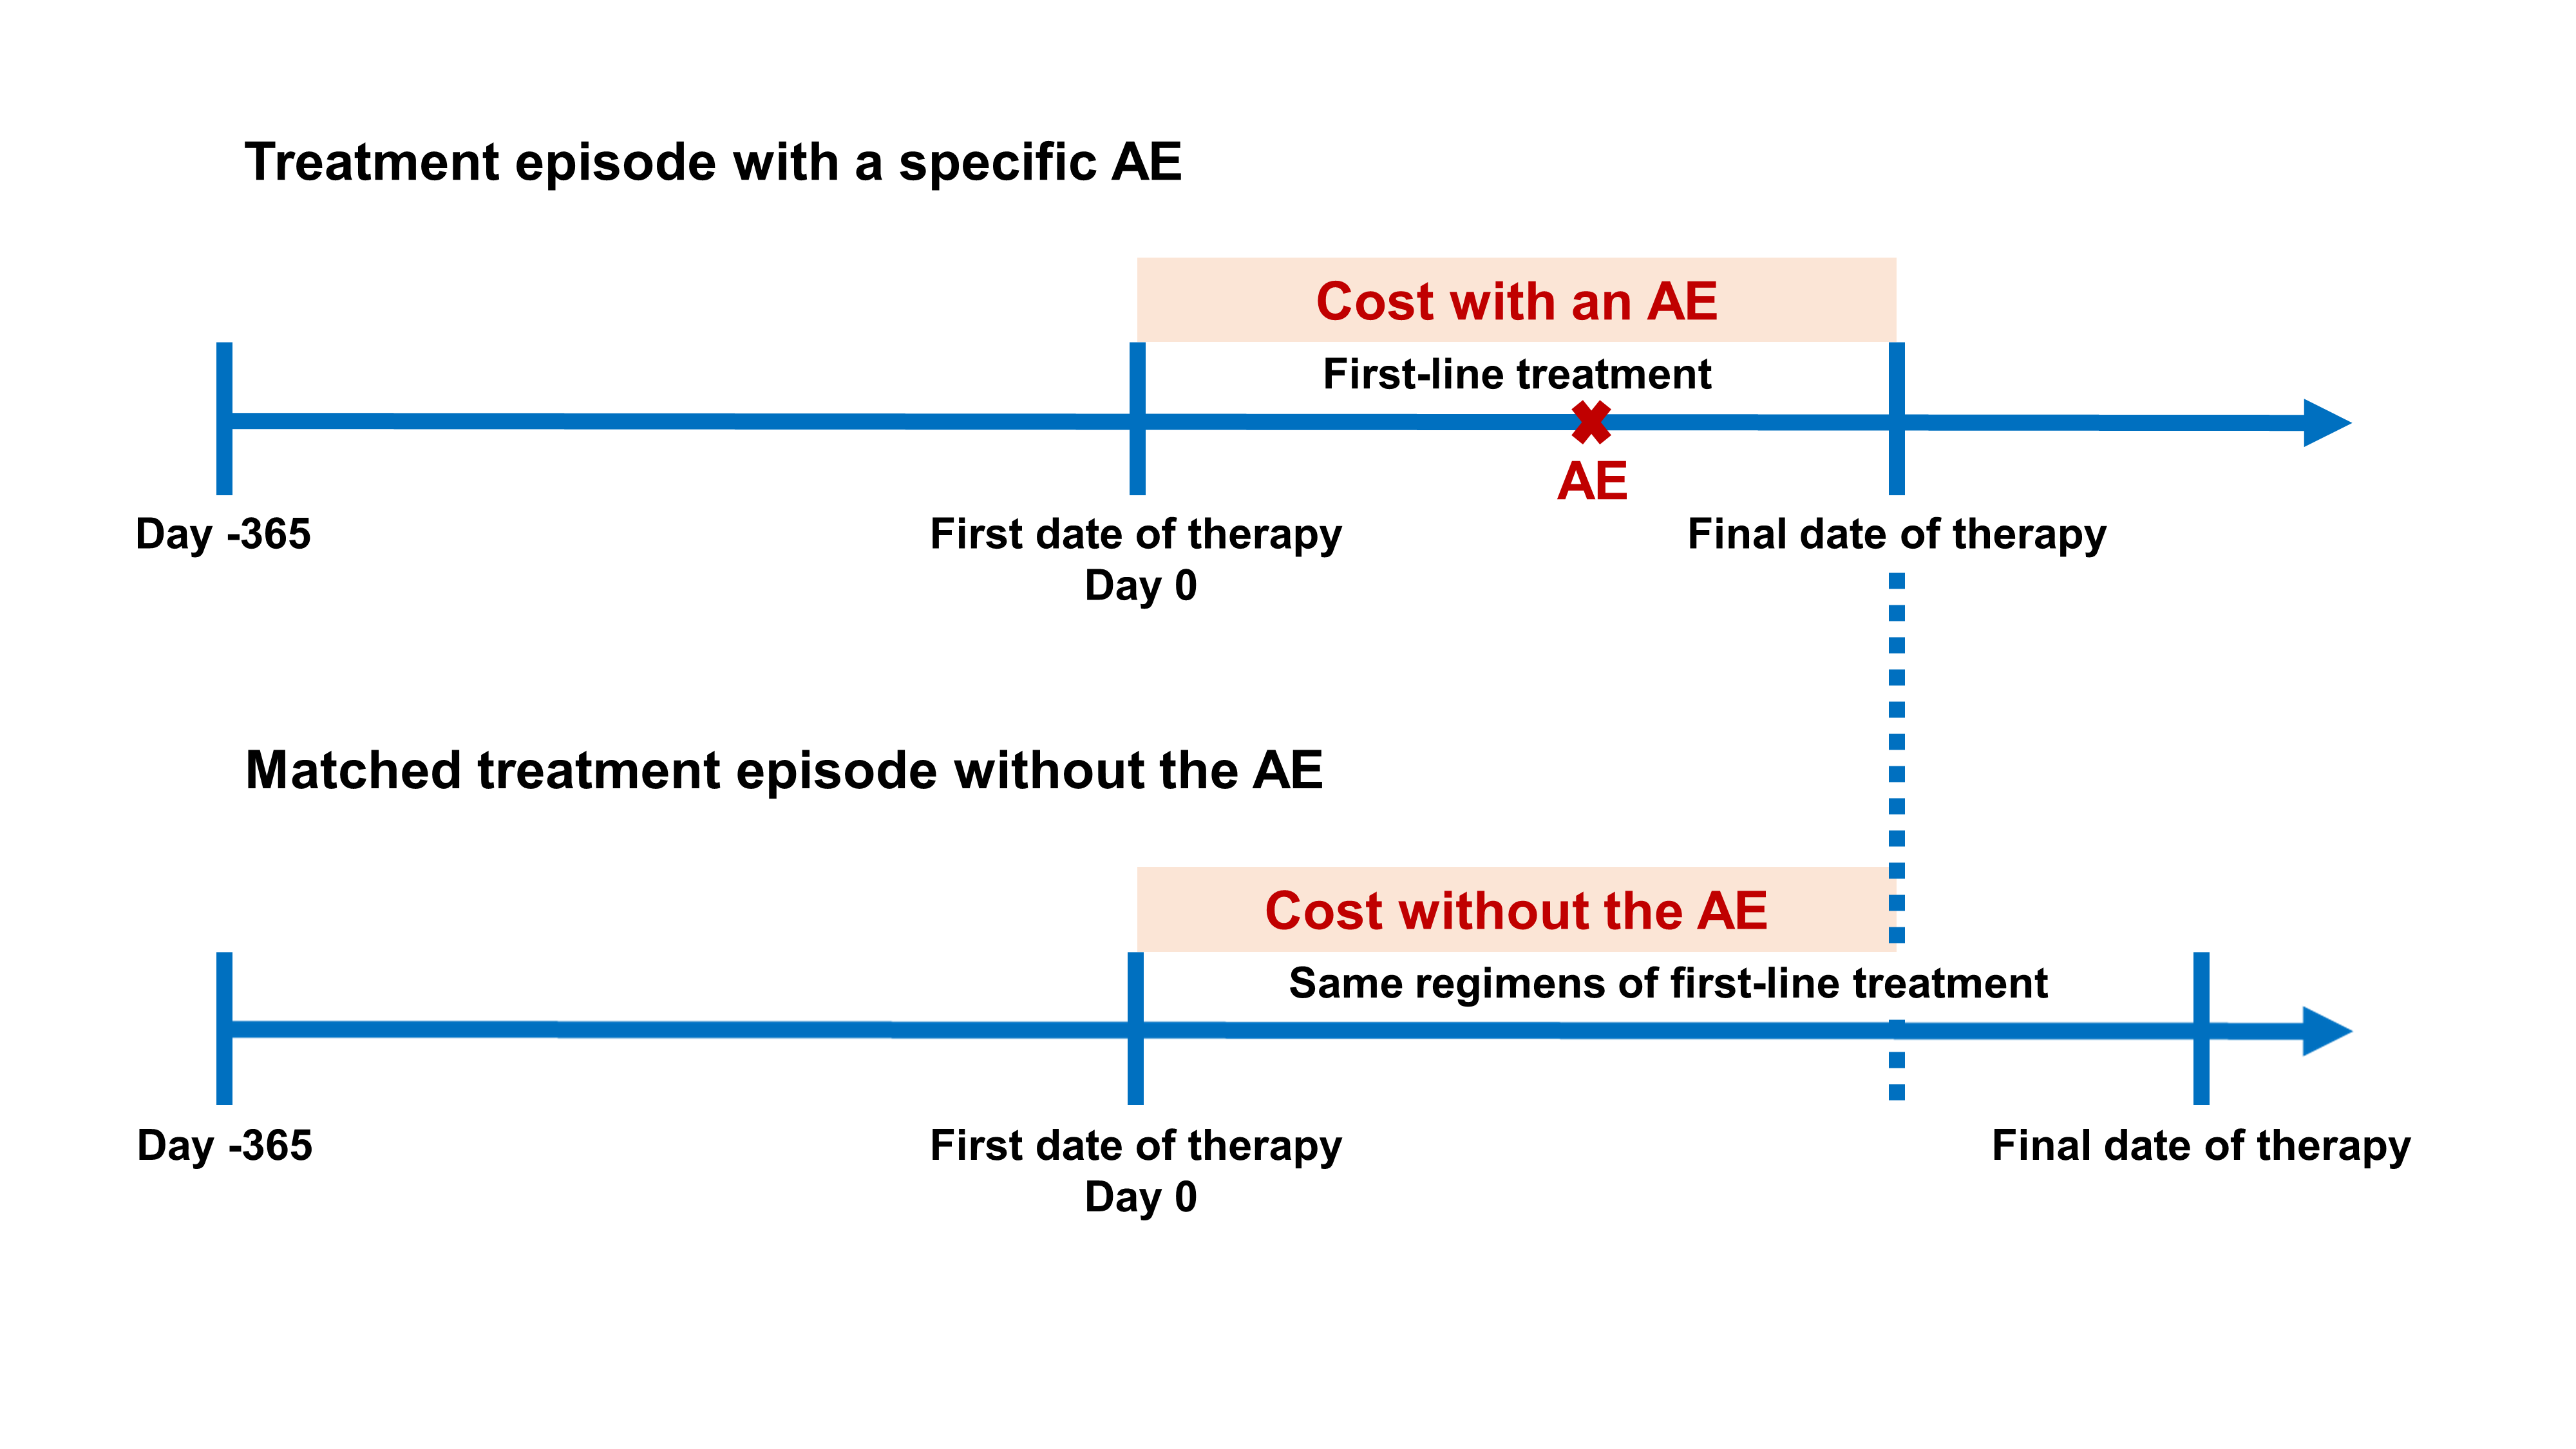


**Supplementary Figure 2.** (A) Time on first-line treatment and (B) Overall survival of targeted therapy, immunotherapy, and chemotherapy. CI: confidence interval.


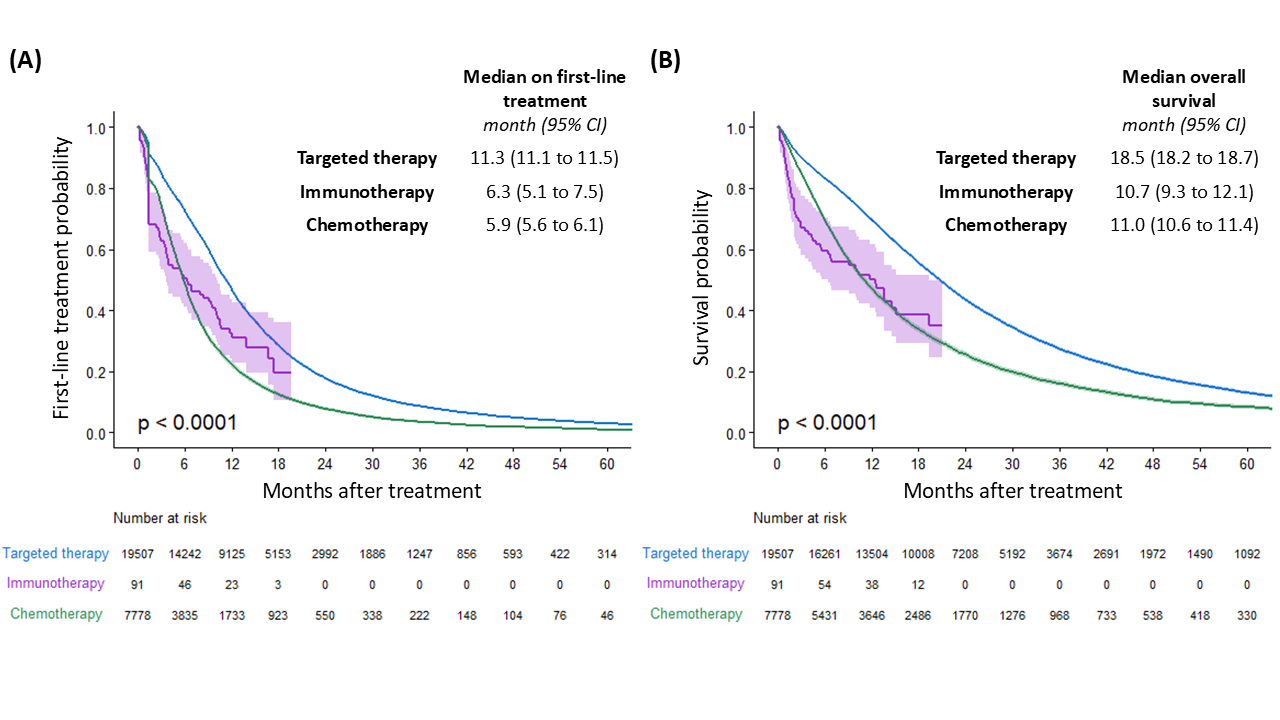


**Supplementary Table 1.** NHI codes for identifying first-line treatment

|  | NHI code |
| --- | --- |
| Targeted therapy, oral dosing | |
| Afatinib | B026031100, B026032100, B026033100, B026034100, BC26031100, BC26032100, BC26033100, BC26034100 |
| Alectinib | BC27028100 |
| Ceritinib | BC26674100 |
| Crizotinib | BC25938100, BC25939100 |
| Erlotinib | B024407100, B024410100, B025071100, B025077100, BC24407100, BC24410100, BC25071100, BC25077100, BC26873100, BC26874100 |
| Gefitinib | B023808100, BC23808100 |
| Immunotherapy, intravenous | |
| Pembrolizumab | KC01025219 |
| Chemotherapy, intravenous | |
| Carboplatin, | AC57314235, AC573142AP, B020725235, B0207252AP, B020966248, B020966261, B020966272, B021047221, B021047235, B0210472AP, B021701235, B0217012AP, B024591235, B0245912AP, B025626235, B0256262AP, BC21701235, BC217012AP, BC25626235, BC256262AP, BC27083235, BC270832AP |
| Cisplatin | B012020248, B012184229, B018873238, B018873255, B019333229, B019333248, B021782229, B021782248, B021782255, BC18873238, BC18873255, , BC21782248, BC21782255, BC27762229, BC27762248 |
| Docetaxel | AC61087209, AC61087209, B025055206, B025055212, B025558226, BB25600212, BB25600226, BC25558212, BC25558226, BC27138206, BC27138212, BC27712209, BC27712219, BC27786209, BC27786219 |
| Etoposide | A036593221, B020480221, B020682221, B020881221, B020881229, B021714221, B022435221, B022921221, B024579221, X000171100 |
| Gemcitabine | AC61175263, B025183209, B025183212, B025183263, B025899221, B025899240, B025899248, B026065209, B026065212, B026065263, BB25183212, BB25183263, BB25183263, BC25183209, BC25183263, BC25899221, BC25899240, BC25899248, BC26065209, BC26065212, BC26065263, BC266272AF, BC266272FS, BC27106209, BC27106263, BC27468209, BC27468263, BC27808221, BC27808240, BC27808248 |
| Paclitaxel | A045331221, A045331229, A045331235, A045331240, A045331248, A0453312E2, A046429221, AC45331229, AC45331235, AC45331240, AC45331248, AC453312E2, B021157221, B0211572E2, B022400221, B022400240, B024476221, B024476240, B024476248, B0244762E2, BB21157221, BB211572E2, BC21157221, BC211572E2, BC27434221, BC27434240, BC27434248, BC27434255, BC27434296, BC274342E2, BC27504221, BC27504248, BC275042E2, BC28013221, BC280132E2, X000221255, X000222255 |
| Pemetrexed | AC60575255, AC60596277, B024084277, BC26921255, BC26921277, BC27066255, BC27347277, BC27532255, BC27532277, BC27822277 |
| Vinorelbine | B024472209, B024472221, B025898209, B025898221, BC24472209, BC24472221, BC25898209, BC25898221, X000217209, X000225209 |

NHI: National Health Insurance.

**Supplementary Table 2.** ICD codes for identifying adverse events

| Adverse events | ICD-9 code | ICD-10 code |
| --- | --- | --- |
| Acute kidney injury | 584.5, 584.6, 584.7, 584.8, 584.9 | N17.0, N17.1, N17.2, N17.8, N17.9 |
| Alopecia | 704.00, 704.09 | L63.0, L64.0, L65.8, L65.9 |
| Anemia | 285.0, 281.8, 281.9, 284.8, 285.22, 285.29, 285.8, 285.9 | D53.8, D53.9, D63.0, D63.8, D64.1, D64.2, D64.3, D64.81, D64.89, D64.9 |
| Anorexia | 307.59, 783.0 | F50.8, R63.0 |
| Colitis | 558.2, 558.9 | K52.1, K52.89, K52.9, K92.81 |
| Constipation | 564.0 | K59.00, K59.01, K59.09 |
| Diarrhea | 564.5, 787.6, 787.7, 787.91 | K52.89, K59.1, R15.0, R15.2, R15.9, R19.5, R19.7 |
| Dyspnea | 786.00, 786.01, 786.05, 786.06, 786.09 | R06.00, R06.02, R06.09, R06.4, R06.82, R06.89, R06.9 |
| Edema | 782.3 | R60.0, R60.1, R60.9 |
| Electrolyte imbalance | 276.9, 276.1, 276.8, 275.41, 275.2 | E87.8, E87.1, E87.6, E83.51, E83.42 |
| Epistaxis/hemoptysis | 784.7, 786.3 | R04.0, R04.2, R04.89, R04.9 |
| Fatigue/asthenia | 300.5, 780.71, 780.79, 799.3 | F48.8, R53.0, R53.1, R53.81, R53.82, R53.83 |
| Folliculitis | 704.8, 704.9, 706.0, 706.1 | L66.3, L70.1, L70.8, L70.9, L73.8, L73.9, L73.9 |
| Hypertension | 401.0, 401.1, 401.9, 402.00, 402.01, 402.10, 402.11, 402.90, 402.91, 405.09, 405.19, 405.99, 997.91 | I10, I11.0, I11.9, I15.8, I15.9, I97.3 |
| Hypothyroidism/ hyperthyroidism | 244.3, 244.8, 244.9, 245.4, 245.8, 245.9 | E03.2, E03.8, E03.9, E06.4, E06.5, E06.9 |
| Hepatitis | 571.49, 573.3 | K71.0, K71.10, K71.11, K71.2, K71.6, K71.7, K71.8, K71.9, K73.1, K73.2, K73.8, K75.2, K75.89, K75.9, K77 |
| Interstitial lung disease/pneumonitis | 495.8, 495.9, 508.8, 508.9, 515, 516.8, 516.9 | J70.2, J70.3, J70.4, J70.8, J70.9, J84.09, J84.111, J84.113, J84.17, J84.89, J84.9 |
| Mucositis/stomatitis | 528.0, 528.1, 528.2, 528.9 | A69.0, K12.0, K12.1, K12.30, K12.31, K12.32, K12.33, K12.39 |
| Musculoskeletal pain | 719.40, 719.41, 719.42, 719.43, 719.44, 719.45, 719.46, 719.47, 719.48, 719.49, 724.1, 724.2, 724.3, 729.5 | M25.50, M25.511, M25.512, M25.519, M25.521, M25.522, M25.529, M25.531, M25.532, M25.539, M25.551, M25.552, M25.559, M25.561, M25.562, M25.569, M25.571, M25.572, M25.579, M54.30, M54.31, M54.32, M54.40, M54.41, M54.42, M54.5, M54.6, M79.601, M79.602, M79.603, M79.604, M79.605, M79.606, M79.609, M79.621, M79.622, M79.629, M79.631, M79.632, M79.639, M79.641, M79.642, M79.643, M79.644, M79.645, M79.646, M79.651, M79.652, M79.659, M79.661, M79.662, M79.669, M79.671, M79.672, M79.673, M79.674, M79.675, M79.676 |
| Nausea/vomiting | 536.2, 787.01, 787.02, 787.03 | R11.0, R11.10, R11.11, R11.12, R11.14, R11.2 |
| Neutropenia/  febrile neutropenia | 288.0 | D70.1, D70.2, D70.3, D70.4, D70.8, D70.9, D72.819 |
| Neuropathy | 356.4, 356.8, 357.3, 357.4, 357.6, 357.7, 357.8, 357.9 | G13.0, G60.3, G62.0, G62.2, G62.89, G62.9, G63 |
| Pruritus | 698.2, 698.8, 698.9 | L28.2, L29.8, L29.9, R21 |
| Rash/erythema | 695.89, 782.1, 782.8, 782.9 | L53.8, L53.9, L54, R21, R23.4, R23.8, R23.9 |
| Sepsis/septicemia | 038.8, 038.9 | A41.89, A41.9, I26.90, R65.20, R65.21 |
| Thrombocytopenia | 287.4, 287.5 | D69.59, D69.6 |
| Tinnitus/hearing loss | 388.2, 388.30, 388.31, 388.32, 388.40, 389.8, 389.9, V41.2 | H91.20, H91.21, H91.22, H91.8X1, H91.8X2, H91.8X3, H91.8X9, H91.90, H91.91, H91.92, H91.93, H93.11, H93.12, H93.13, H93.19, H93.241, H93.242, H93.243, H93.249 |
| Visual disturbance | 368.10, 368.11, 368.12, 368.13, 368.8, 368.9, 369.3, 369.8, 369.9, V41.0, V41.1 | H53.10, H53.11, H53.121, H53.122, H53.123, H53.129, H53.131, H53.132, H53.133, H53.139, H53.141, H53.142, H53.143, H53.149, H53.19, H53.8, H53.9, H54.3, H54.60, H54.61, H54.62, H54.7, H57.9 |

ICD: International Classification of Disease.
